# Supplementary material
Source: PubMed Central journal article supplement (PMC10134803)
Supplement: msystems.01260-22-s0005.pdf [file msystems.01260-22-s0005.pdf]

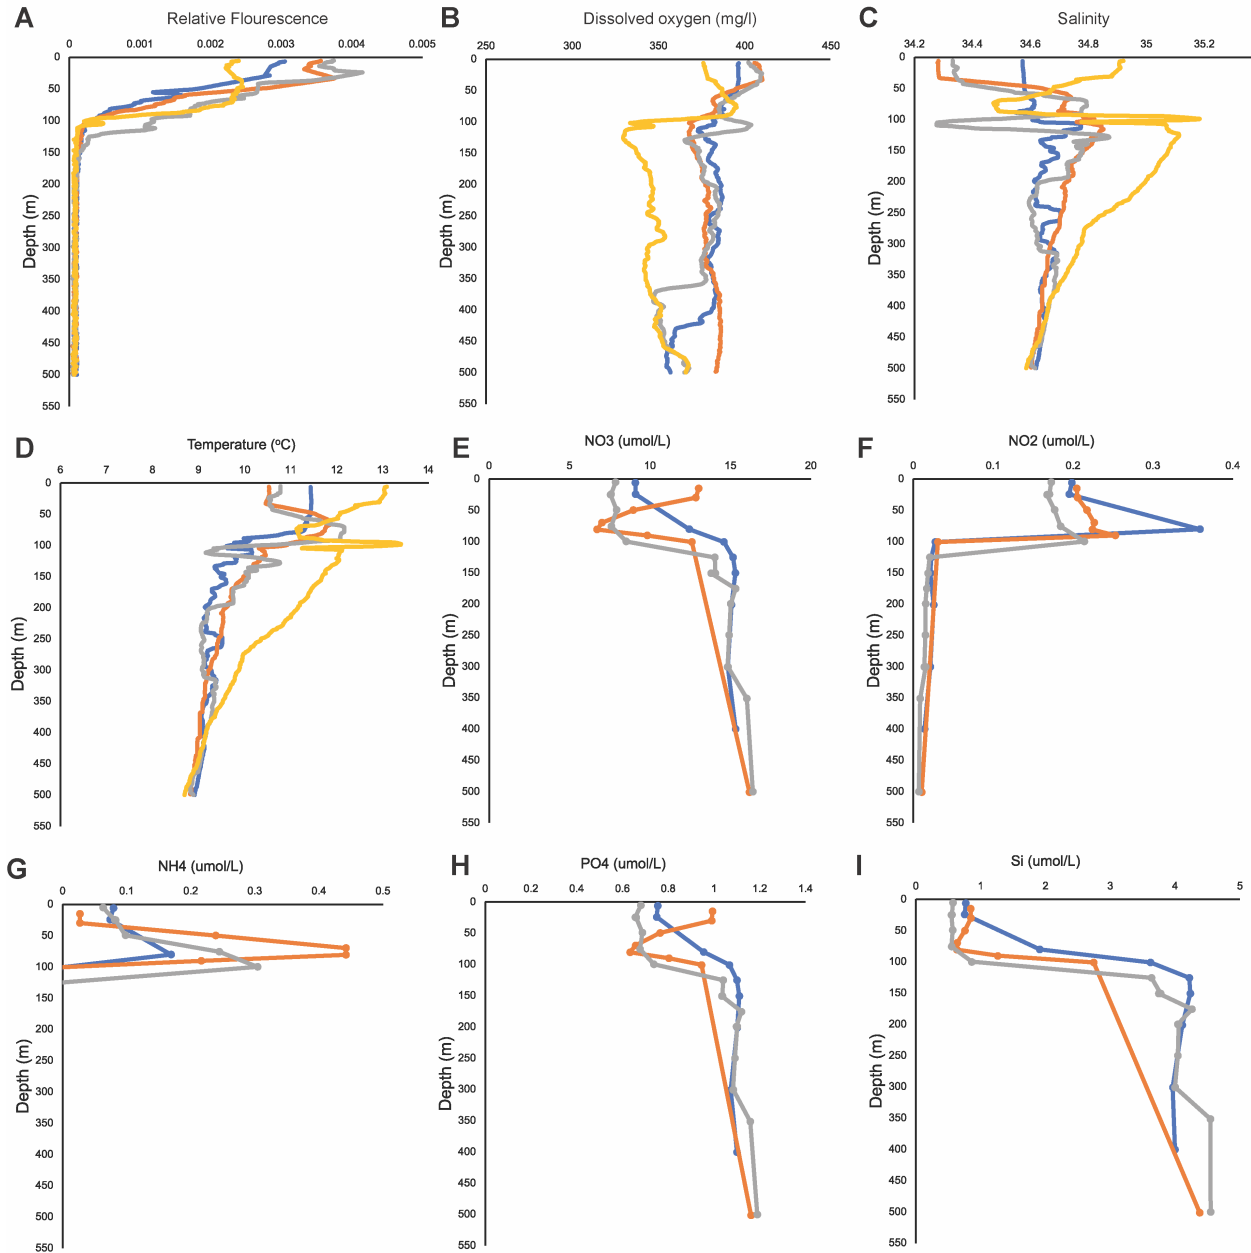

**Legend:**

- March 5    ● March 9
- March 7    ● March 17

**Supplementary Figure 2.** Physicochemical status of the time points sampled during the March 2018 research expedition at the Southern Ocean Time Series (SOTS). CTD data are presented for all four dates sampled, and nutrient data are presented only for March 5th, 7th, and 9th sampling dates. A) CTD Fluorescence data, expressed as relative fluorescence units. B) CTD Dissolved oxygen measurements expressed as mg/l. C) CTD salinity data D) CTD Temperature data E) Nitrate (NO<sub>3</sub>) measurements F) Nitrite (NO<sub>2</sub>) measurements G) Ammonium (NH<sub>4</sub>) measurements H) Phosphate (PO<sub>4</sub>) measurements I) Silicate (Si) measurements.
