# Supplementary material
Source: PubMed Central journal article supplement (PMC10134803)
Supplement: msystems.01260-22-s0006.pdf [file msystems.01260-22-s0006.pdf]

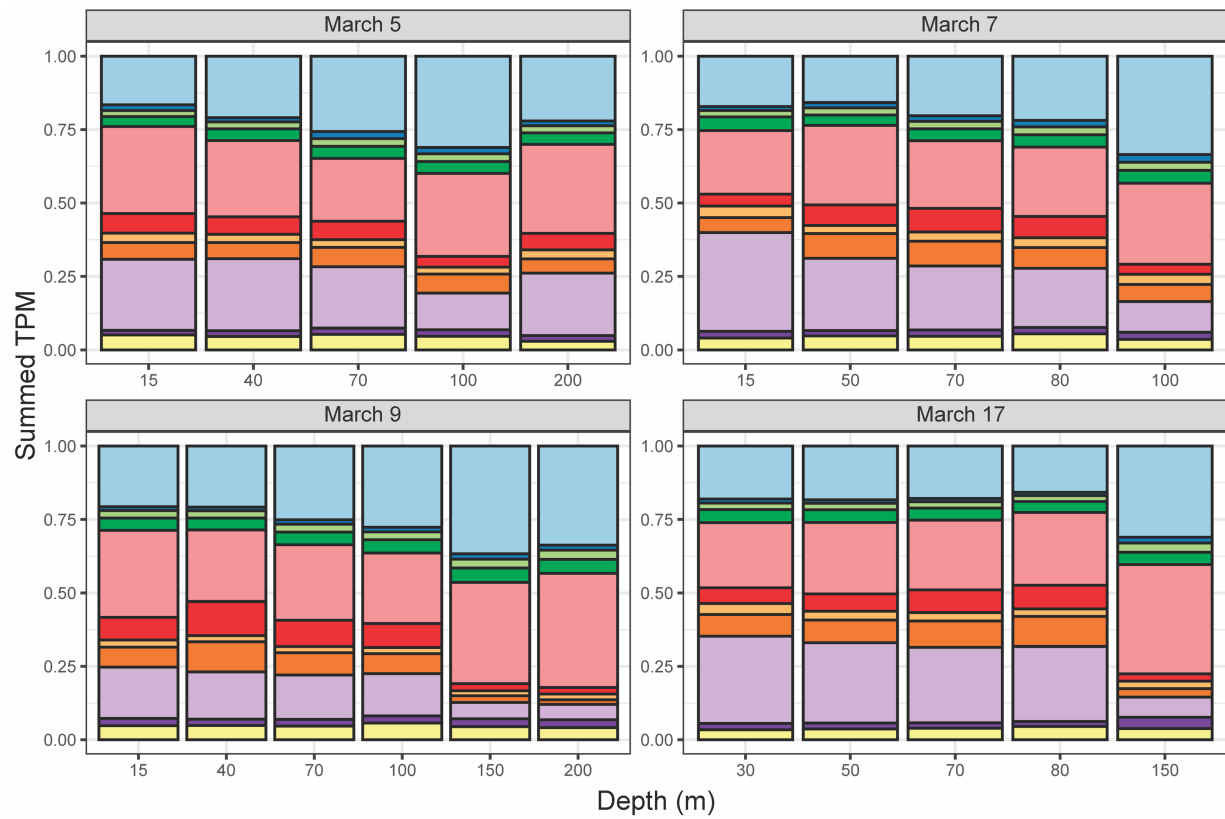

**Supplementary Figure 3.** Proportions of reads assigned across eukaryotes separated by date and depth sampled. The values represent the summed normalized transcripts (TPMs) across open reading frames assigned to a given taxonomic rank within the MMTESP database.
