# Supplementary material
Source: PubMed Central journal article supplement (PMC10134803)
Supplement: msystems.01260-22-s0008.pdf [file msystems.01260-22-s0008.pdf]

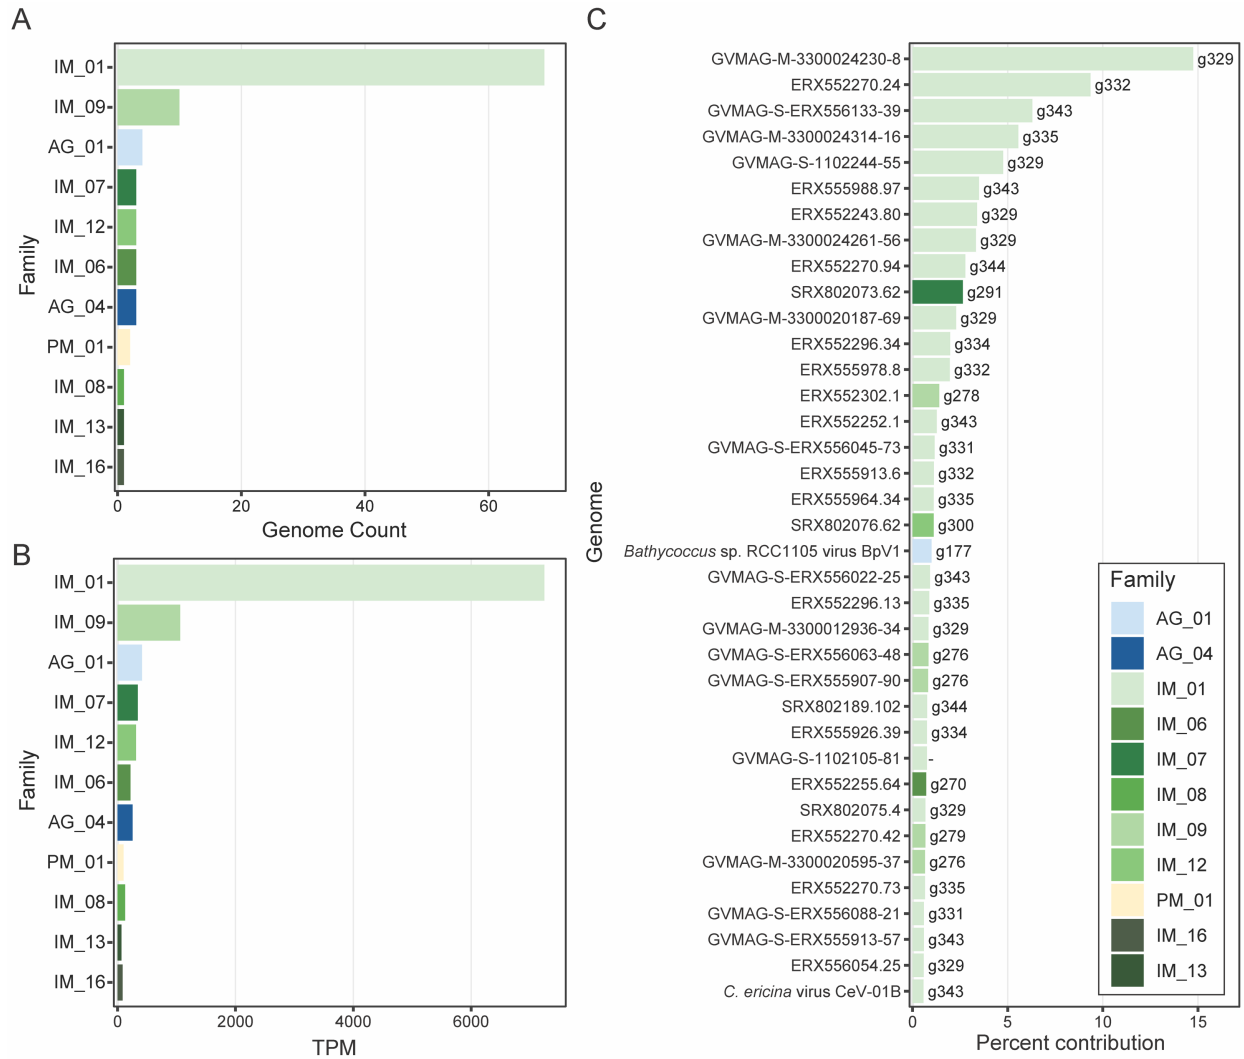

**Supplementary Figure 5.** Summary of the A) Taxonomic distribution of the 100 genomes. The genome count illustrates the number of genomes detected within a specific Family level assignment. B) Relative summed expression levels of the Family-level genome/MAG assignments across the entire in situ dataset, represented as TPMs. C) Genome-level contribution towards the total pool of giant-virus transcripts (TPMs), represented as a percent. Each genome is color coded by Family level assignment and the Genus level assignment is shown in text next to each bar.
