# Supplementary material
Source: PubMed Central journal article supplement (PMC10134803)
Supplement: msystems.01260-22-s0009.pdf [file msystems.01260-22-s0009.pdf]

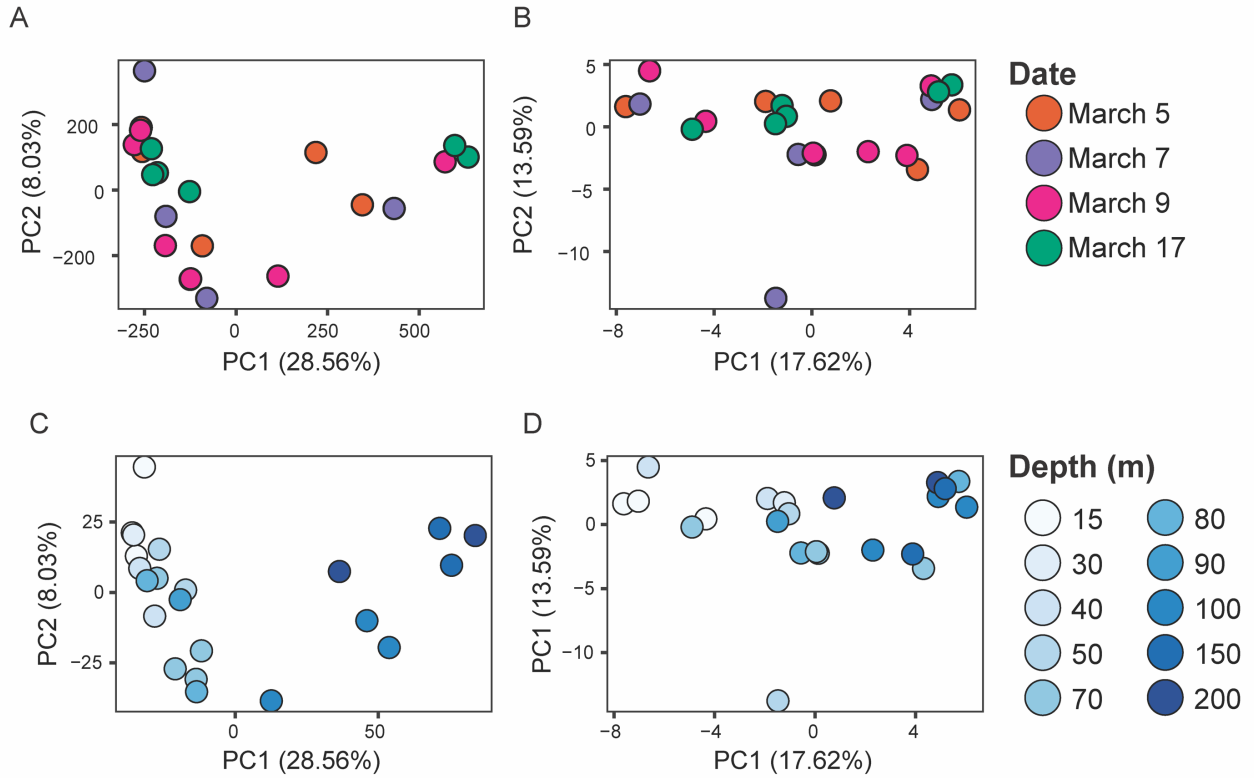

**Supplementary Figure 6.** Shifts in the transcript abundance patterns of eukaryotic and giant viruses. Each plot shows a principal components (PC) analysis ordination of normalized transcript patterns across A) Eukaryotic *RPB1* candidates colored by date sampled B) *Nucleocytoviricota* total genome recruitments colored by date sampled C) Eukaryotic *RPB1* candidates colored by depth sampled D) *Nucleocytoviricota* total genome recruitments colored by depth sampled.
