# Supplementary material
Source: PubMed Central journal article supplement (PMC10134803)
Supplement: msystems.01260-22-s0010.pdf [file msystems.01260-22-s0010.pdf]

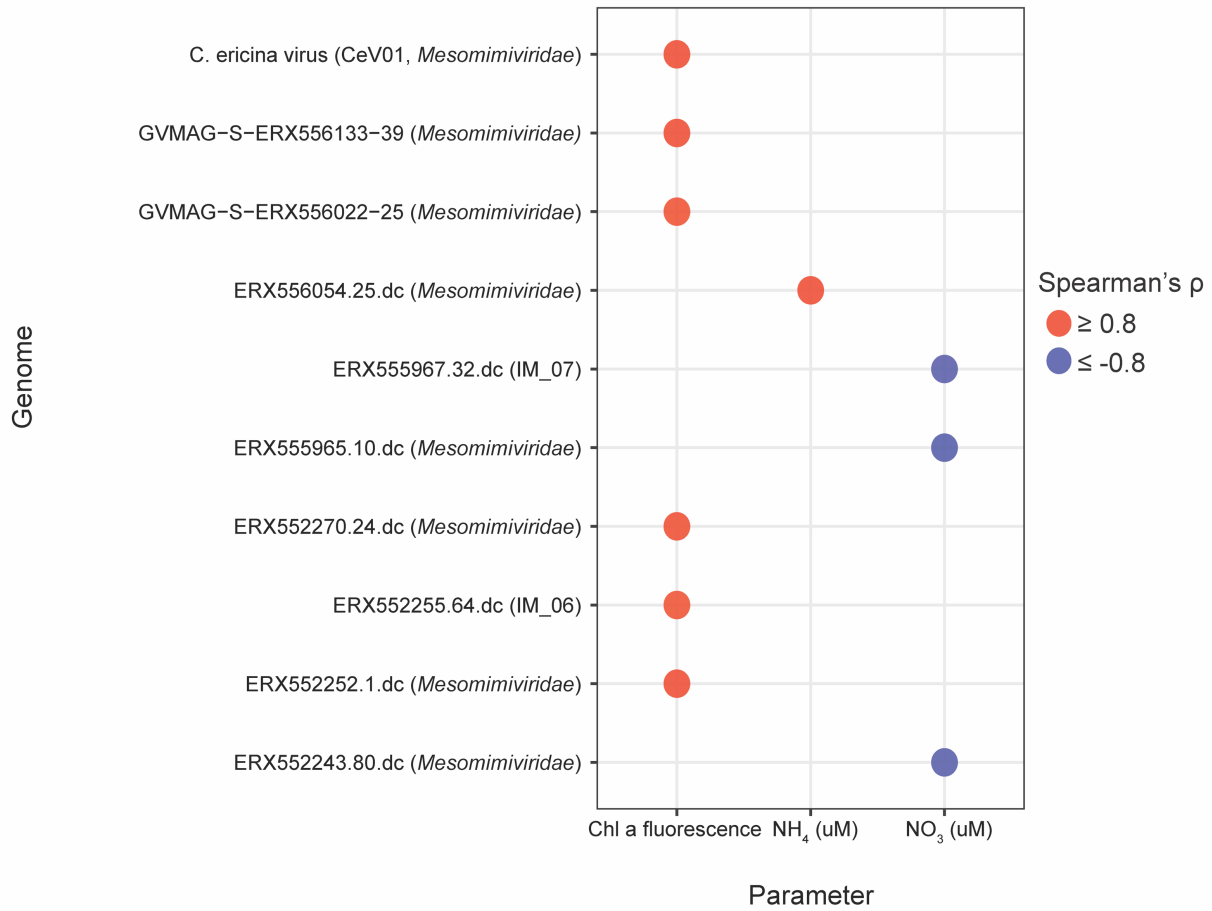

**Supplementary Figure 7.** Spearman's correlations between environmental parameters (CTD and nutrient data) and summed transcript abundances of each giant virus genome/MAG across the in situ dataset. Only correlations with Spearman's rho ( $\rho$ )  $\pm 0.8$  with an adjusted p-value (Holm method) of  $\leq 0.1$  are shown. The Family-level assignment of each genome is shown in parentheses next to its ID.
