# Supplementary material
Source: PubMed Central journal article supplement (PMC10134803)

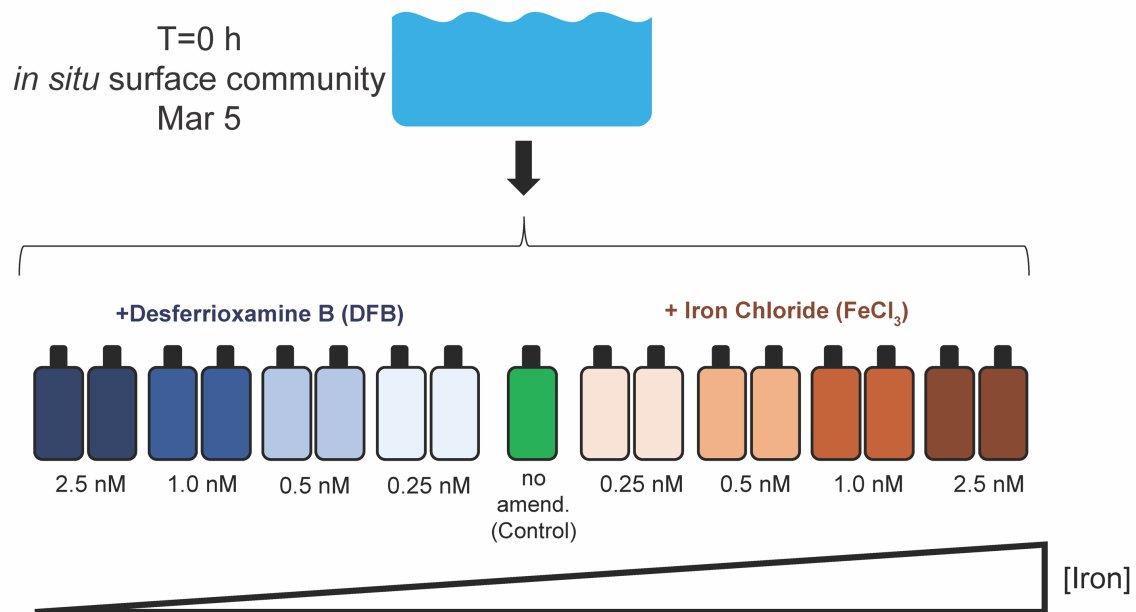

**Supplementary Figure 1.** Schematic of the “Growout-1” (GRW1) iron incubation experimental design.

Supplement: msystems.01260-22-s0004.pdf [file msystems.01260-22-s0004.pdf]
